# Supplementary material
Source: publisher figshare collection journal article supplement (https://rs.figshare.com/ndownloader/files/9071197)
Supplement: Supplementary file 1 [file 9071197]

**Supplemental online material**

Plant defenses limit herbivore population growth by changing predator-prey interactions

Mônica F. Kersch-Becker1* André Kessler1‡, and Jennifer S. Thaler1,2†

1Department of Ecology and Evolutionary Biology, Cornell University, Ithaca, NY 14853, U.S.A.

2Department of Entomology, Cornell University, Ithaca, NY 14853, U.S.A.

DOI 10.1098/rspb.2017.1120

*Volatile organic compounds collection and extraction.* - Leaves were carefully placed inside 500mL polyethylene cups with holes in both ends. Air was pulled through the cups and into a charcoal air-sampling trap (ORBOTM-32; SUPELCO, State College, PA) by a portable 12-V DC vacuum pump (Gast Mfg, Benton Harbor, MI). Collections were taken simultaneously for 8 hours in a greenhouse. Each treatment was replicated 5 times for a total of 45 plants. The ORBO-32 tubes were desorbed with dichloromethane and samples were analyzed Gas chromatography–mass spectrometry (GC-MS) analysis of the trapped VOCs was used to measure the suite of odor profiles present in the headspace of plants[18]. Ion chromatograms were integrated and peak areas of individual compounds were normalized by the area of the internal standard (tetraline).
